# Supplementary material
Source: PubMed Central journal article supplement (PMC2756194)
Supplement: supp_M109.031757_jbc.M109.031757-1.pdf [file supp_M109.031757_jbc.M109.031757-1.pdf]

**Supplementary Table 1. Oligonucleotide List**

| Oligonucleotide               | Sequence                                              | Description           |
|-------------------------------|-------------------------------------------------------|-----------------------|
| <i>agrD</i> Truncation Oligos |                                                       |                       |
| ARH111                        | 5'-GTTGTTTCTAGATTATTGTGTTAATTCTTT<br>TGGTACTTCAAC-3'  | <i>agrD</i> Δ3aa rev  |
| ARH112                        | 5'-GTTGTTTCTAGATTATTCTTTTGGTACTTC<br>AACTTCATCC-3'    | <i>agrD</i> Δ6aa rev  |
| ARH113                        | 5'-GTTGTTTCTAGATTATACTTCAACTTCATC<br>CATTATGAAG-3'    | <i>agrD</i> Δ9aa rev  |
| ARH114                        | 5'-GTTGTTTCTAGATTATTCATCCATTATGAA<br>GTCACAAGTAC-3'   | <i>agrD</i> Δ12aa rev |
| ARH115                        | 5'-GTTGTTTCTAGATTACATTATGAAGTCACA<br>AGTACTATAAGC-3'  | <i>agrD</i> Δ14aa rev |
| MJT001                        | 5'-GTTGTTTCTAGATTATGTTAATTCTTTTGG<br>TACTTCAACTTC-3'  | <i>agrD</i> Δ4aa rev  |
| MJT002                        | 5'-GTTGTTTCTAGATTATAATTCTTTTGGTACT<br>TCAACTTCATCC-3' | <i>agrD</i> Δ5aa rev  |
| Point Mutation Oligos         |                                                       |                       |
| ARH153                        | 5'-CTTCTACTTAACTCCAAAAAGAAGAAGG-3'                    | <i>agrB</i> C84S rev  |
| ARH154                        | 5'-CCTTCTTCTTTTGGAGTTATGTAGAAAG-3'                    | <i>agrB</i> C84S for  |
| MJT015                        | 5'-GTACCAAAAGAAGCTACACAATTACAC-3'                     | <i>agrD</i> L41A for  |
| MJT016                        | 5'-GTGTAATTGTGTAGCTTCTTTGGTAC-3'                      | <i>agrD</i> L41 rev   |
| MJT017                        | 5'-GACTTCATAATGGCTGAAGTTGAAGTA-3'                     | <i>agrD</i> D33A for  |
| MJT018                        | 5'-TACTTCAACTTCAGCCATTATGAAGTC-3'                     | <i>agrD</i> D33A rev  |
| MJT019                        | 5'-TTCATAATGGATGCTGTTGAAGTACCA-3'                     | <i>agrD</i> E34A for  |
| MJT020                        | 5'-TGGTACTTCAACAGCATCCATTATGAA-3'                     | <i>agrD</i> E34A rev  |
| MJT021                        | 5'-ATAATGGATGAAGCTGAAGTACCAAAA-3'                     | <i>agrD</i> V35A for  |
| MJT022                        | 5'-TTTGGTACTTCAGCTTCATCCATTAT-3'                      | <i>agrD</i> V35A rev  |
| MJT023                        | 5'-ATGGATGAAGTTGCTGTACCAAAAAGAA-3'                    | <i>agrD</i> E36A for  |
| MJT024                        | 5'-TTCTTTTGGTACAGCAACTTCATCCAT-3'                     | <i>agrD</i> E36A rev  |
| MJT025                        | 5'-GATGAAGTTGAAGCTCCAAAAGAATTA-3'                     | <i>agrD</i> V37A for  |
| MJT026                        | 5'-TAATTCTTTGGAGCTTCAACTTCATC-3'                      | <i>agrD</i> V37A rev  |
| MJT027                        | 5'-GAAGTTGAAGTAGCTAAAGAATTAACA-3'                     | <i>agrD</i> P38A for  |
| MJT028                        | 5'-TGTTAATTCTTTAGCTACTTCAACTTC-3'                     | <i>agrD</i> P38A rev  |
| MJT029                        | 5'-GTTGAAGTACCAGCTGAATTAACACAA-3'                     | <i>agrD</i> K39A for  |
| MJT030                        | 5'-TTGTGTTAATTCAGCTGGTACTTCAAC-3'                     | <i>agrD</i> K39A rev  |
| MJT031                        | 5'-GAAGTACCAAAAAGCTTTAACACAATTA-3'                    | <i>agrD</i> E40A for  |
| MJT032                        | 5'-TAATTGTGTTAAAGCTTTTGGTACTTC-3'                     | <i>agrD</i> E40A rev  |
| MJT033                        | 5'-GCTTATAGTACTGCTGACTTCATAATG-3'                     | <i>agrD</i> C28A for  |
| MJT034                        | 5'-CATTATGAAGTCAGCAGTACTATAAGC-3'                     | <i>agrD</i> C28A rev  |
